# Supplementary material for: Phosphor sensitized thermally activated delayed fluorescence organic light-emitting diodes with ideal deep blue device performances
Source: Royal Society of Chemistry journal article supplement (doi:10.1039/c9tc02746g), 2019-01-01
Supplement: c9tc02746g1.pdf [file c9tc02746g1.pdf]

## **Supporting information**

### **Phosphor sensitized thermally activated delayed fluorescence organic light-emitting diodes with ideal deep blue device performances**

Kyung Hyung Lee, Jun Yeob Lee \*

School of Chemical Engineering, Sungkyunkwan University  
2066, Seobu-ro, Jangan-gu, Seobu-ro, Suwon, Gyeonggi, 16419, Korea  
E-mail : leej17@skku.edu

Table 1. Device performances of deep blue phosphorescent organic light-emitting diodes reported in the literatures.

| Device                                    | 100 cd/m <sup>2</sup> |                         | EQE (%)                  |                           |     |
|-------------------------------------------|-----------------------|-------------------------|--------------------------|---------------------------|-----|
|                                           | CIE                   | LT <sub>50</sub><br>(h) | 100<br>cd/m <sup>2</sup> | 1000<br>cd/m <sup>2</sup> | Max |
| Device 3 (PtON1) <sup>[1]</sup>           | 0.14, 0.18            | 800                     | 3.2                      | N/A                       | 3.2 |
| Exciplex/<br>n-ETL (20 nm) <sup>[2]</sup> | 0.15, 0.21            | 1                       | 23                       | 21                        | 24  |

## References

- [1]. T. B. Fleetham, L. Huang, K. Klimes, J. Brooks, J. Li, *Chem. Mater.* 2016, 28, 3276-3282.
- [2]. H. Lim, H. Shin, K. -H. Kim, S. -J. Yoo, J. -S. Huh, J. -J. Kim, *ACS Appl. Mater. Interfaces* 2017, 9, 37883-37887.
